# Supplementary material
Source: HighWire-hosted journal article supplement (http://ajnr-stage2.highwire.org/highwire/filestream/183187/field_highwire_adjunct_files/0/0643.pdf)
Supplement: 0643.pdf [file 0643.pdf]

**Online Table 1: GMH grade and postnatal brain parenchyma correlation**

|                      |        | GMH grade |         |          |         |          |         |
|----------------------|--------|-----------|---------|----------|---------|----------|---------|
|                      |        | 0         | 1       | 2        | 3       | 4        | P-value |
| US: brain parenchyma | Same   | 4 (100%)  | 2(100%) | 1 (100%) | 2 (67%) | 0 (0%)   | 0.001   |
|                      | Worse  | 0 (0%)    | 0 (0%)  | 0 (0%)   | 1 (33%) | 8 (100%) |         |
| MR: brain parenchyma | Same   | 1 (33%)   | 5 (83%) | 1 (50%)  | 2 (67%) | 1 (11%)  | 0.008   |
|                      | Better | 0 (0%)    | 0 (0%)  | 1 (50%)  | 0 (0%)  | 0 (0%)   |         |
|                      | Worse  | 2 (67%)   | 1 (17%) | 0 (0%)   | 1 (33%) | 8 (89%)  |         |
| CT: brain parenchyma | Same   | 2 (100%)  | 1(100%) | 0 (0%)   | 2 (67%) | 2 (33%)  | 0.909   |
|                      | Better | 0 (0%)    | 0 (0%)  | 0 (0%)   | 0 (0%)  | 1 (17%)  |         |
|                      | Worse  | 0 (0%)    | 0 (0%)  | 0 (0%)   | 1 (33%) | 3 (50%)  |         |
